# Supplementary material for: Copper doped BaMnO3perovskite catalysts for NO oxidation and NO2-assisted diesel soot removal
Source: Royal Society of Chemistry journal article supplement (doi:10.1039/c7ra04980c), 2017-01-01
Supplement: c7ra04980c1.pdf [file c7ra04980c1.pdf]

**Copper doped BaMnO<sub>3</sub> perovskite catalysts for NO oxidation and  
NO<sub>2</sub>-assisted diesel soot removal.**

Verónica Torregrosa-Rivero, Vicente Albaladejo-Fuentes\*, María-Salvadora Sánchez-Adsuar, María-José Illán-Gómez

*Carbon Materials and Environment Research Group, Department of Inorganic Chemistry, Faculty of Science, Universidad de Alicante, Alicante, Spain*

*\* corresponding author: vicente.albaladejo@ua.es. Phone: +34965903975.*

*Department of Inorganic Chemistry, Faculty of Science, Universidad de Alicante, Av. Alicante s/n, 03690, San Vicente del Raspeig, Alicante, Spain*

**Figure S1. FESEM images of a) BMC0 and b) BMC3**

**a) BMC0**

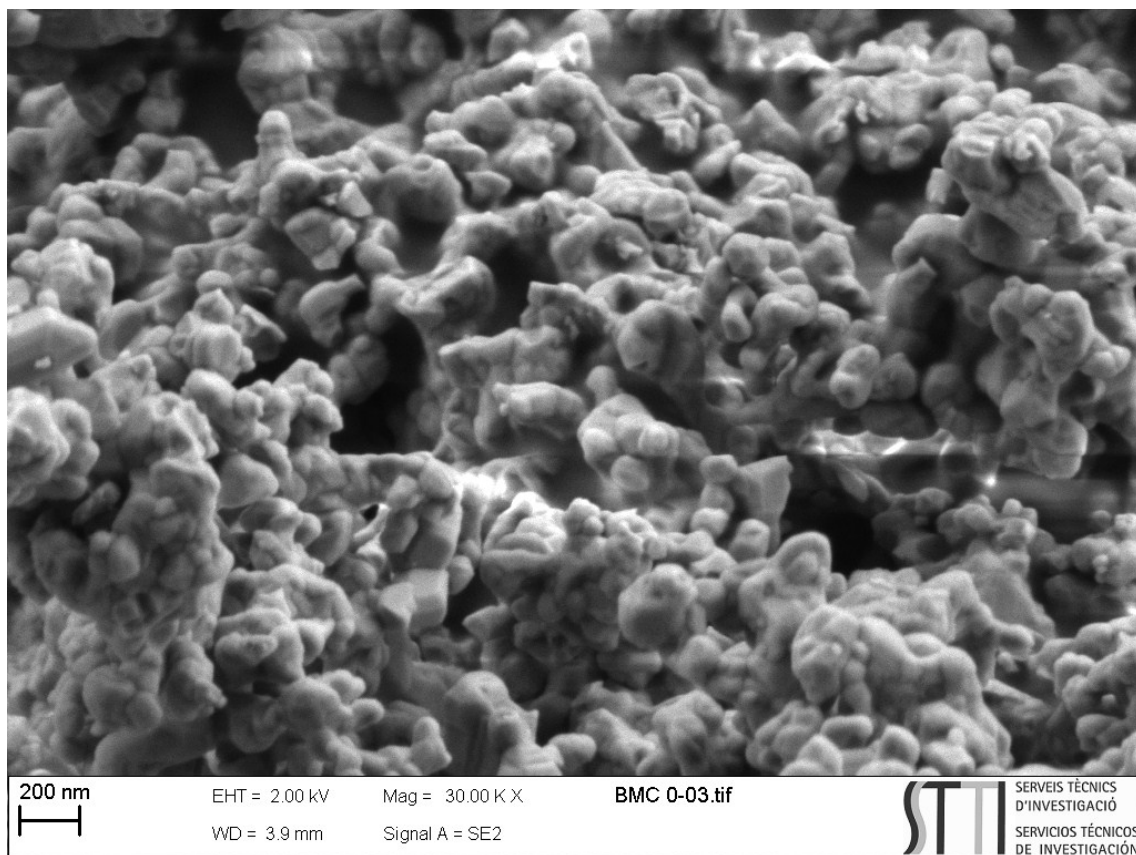

**b) BMC3**

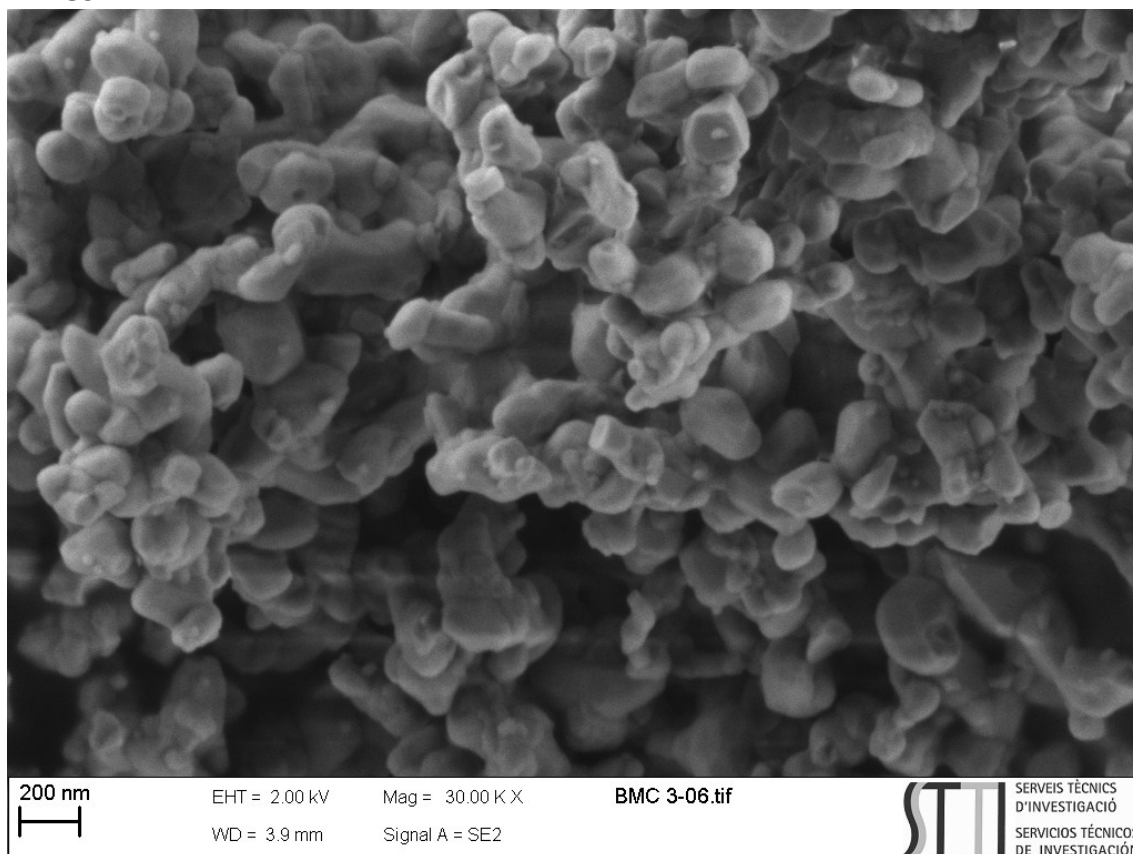

**Experimental details**

The morphology of catalysts was analyzed using a ZEISS Merlin VP Compact Field Emission Scanning Electron Microscopy (FESEM) equipment.

**Figure S2 O<sub>2</sub>-TPD profiles of the BaMn<sub>1-x</sub>Cu<sub>x</sub>O<sub>3</sub> catalysts.**

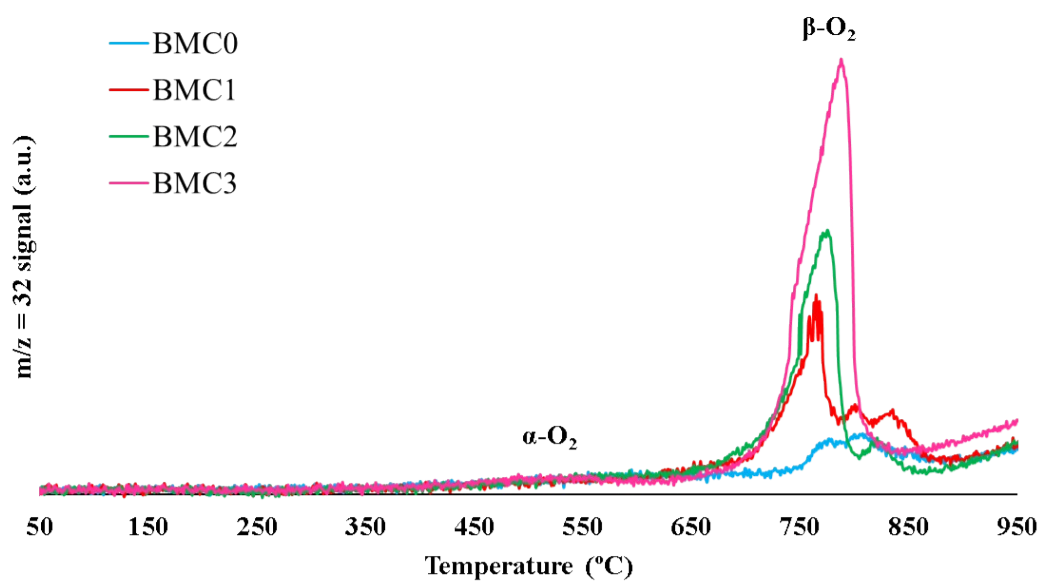

#### Experimental details

Oxygen desorption experiments under temperature programmed conditions (O<sub>2</sub>-TPD) were carried out by heating 20 mg of the catalyst in a quartz tube reactor at 10 °C/min from room temperature to 950 °C in He atmosphere (100 ml/min, Pt = 1 atm). The composition of the outlet gas was monitored by means of a quadrupolar mass spectrometer (QMS), PFEIFFER VACUUM model THERMOSTAR GSD301T.

**Figure S3. TPR Soot conversion profiles of the  $\text{BaMn}_{1-x}\text{Cu}_x\text{O}_3$  and platinum reference catalysts in  $\text{O}_2$  atmosphere.**

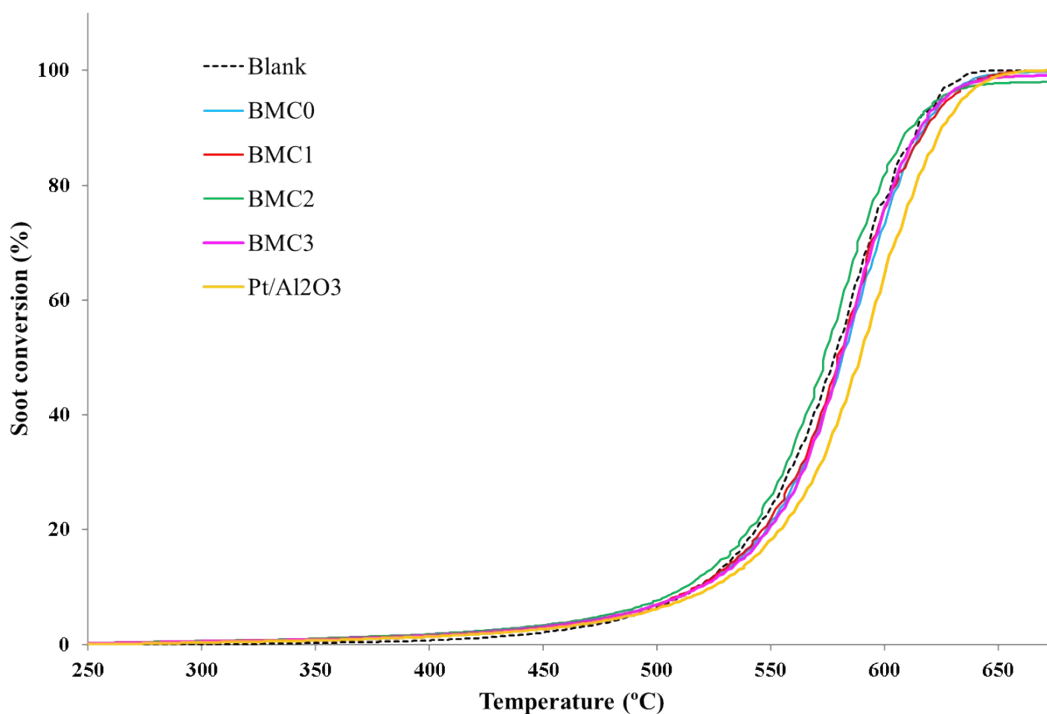

#### Experimental details

Soot oxidation catalysts activity was determined by Temperature Programmed Reaction (TPR) using an atmosphere containing 5 %  $\text{O}_2$  and balance with  $\text{N}_2$ , and a gas flow of 500 ml/min. 80 mg of the sample and 20 mg of Printex U carbon black were diluted with SiC in a mass ratio 1:4, and heated up from 25 to 800 °C, at 10 °C/min in a quartz fixed-bed reactor. The gas composition as a function of temperature was monitored by specific NDIR-UV gas analyzers for NO,  $\text{NO}_2$ , CO,  $\text{CO}_2$  and  $\text{O}_2$  (Rosemount Analytical Model BINOS 1001, 1004 and 100).

Figure S4. Cycles of TPR Soot conversion profiles of a) BMC0, b) BMC3 and c) Pt/Al<sub>2</sub>O<sub>3</sub>.

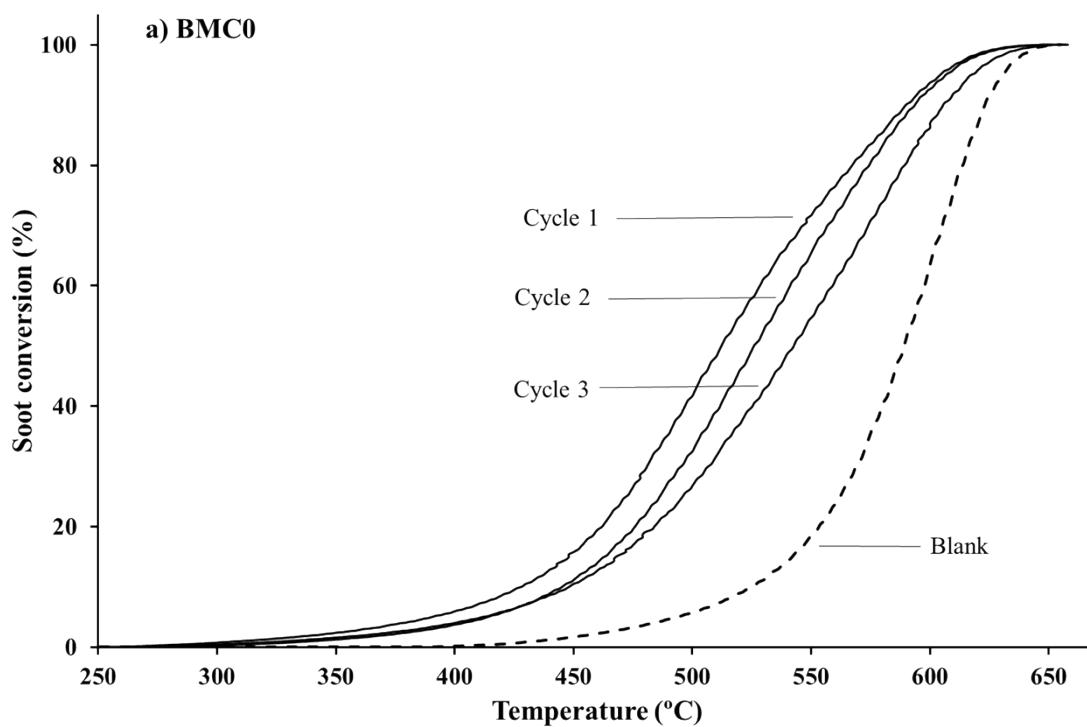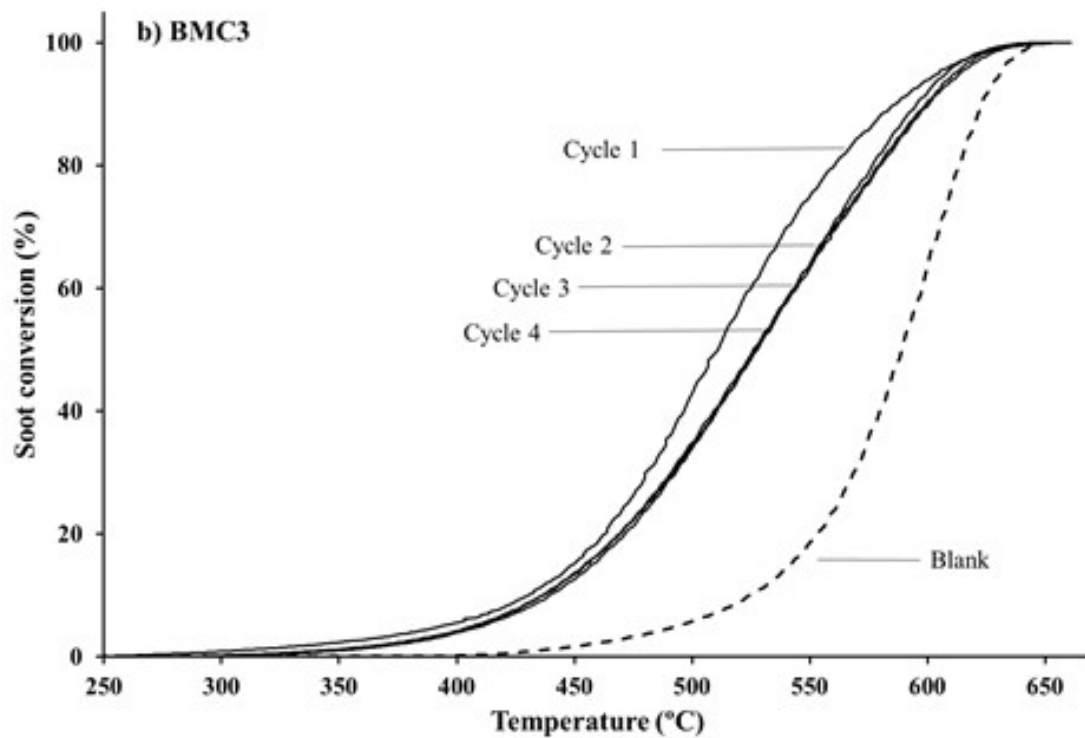

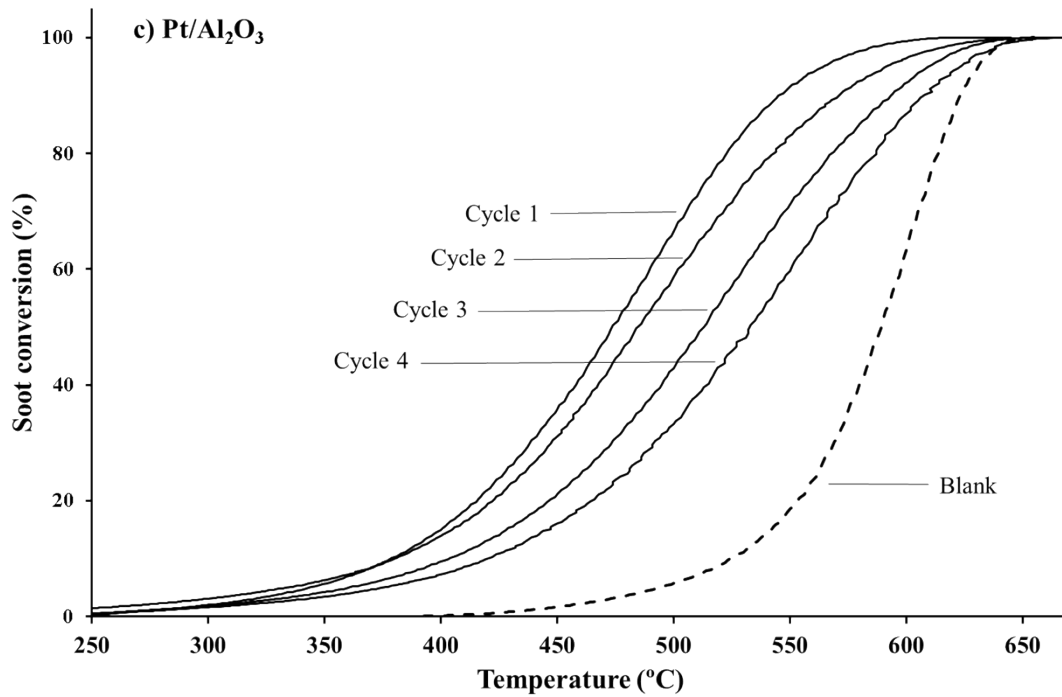

#### Experimental details

Cyclic soot oxidation catalysts activity was determined by Temperature Programmed Reaction (TPR) using an atmosphere containing 500 ppm NO, 5 % O<sub>2</sub> and balance with N<sub>2</sub>, and a gas flow of 500 ml/min. 80 mg of the sample and 20 mg of Printex U carbon black were diluted with SiC in a mass ratio 1:4, and heated up from 25 to 800 °C, at 10 °C/min in a quartz fixed-bed reactor. The gas composition as a function of temperature was monitored by specific NDIR-UV gas analyzers for NO, NO<sub>2</sub>, CO, CO<sub>2</sub> and O<sub>2</sub> (Rosemount Analytical Model BINOS 1001, 1004 and 100).

**Table S1. XPS surface elemental composition of the BaMn<sub>1-x</sub>Cu<sub>x</sub>O<sub>3</sub> catalysts.**

| Catalyst | XPS surface w.t.% |         |           |         |        |         |        |         |
|----------|-------------------|---------|-----------|---------|--------|---------|--------|---------|
|          | Barium            |         | Manganese |         | Copper |         | Oxygen |         |
|          | XPS               | Nominal | XPS       | Nominal | XPS    | Nominal | XPS    | Nominal |
| BMC0     | 56.1              | 57.2    | 13.6      | 22.9    | -      | -       | 30.3   | 20.0    |
| BMC1     | 47.9              | 57.0    | 11.3      | 20.5    | 1.4    | 2.6     | 39.5   | 19.9    |
| BMC2     | 57.6              | 56.8    | 12.2      | 18.2    | 2.6    | 5.3     | 27.6   | 19.8    |
| BMC3     | 47.7              | 56.6    | 10.0      | 15.8    | 2.8    | 7.9     | 39.6   | 19.8    |

Surface elemental composition of the BaMn<sub>1-x</sub>Cu<sub>x</sub>O<sub>3</sub> catalysts calculated from the peak area of O1s, Mn2p<sub>3/2</sub>, Ba3d<sub>5/2</sub> and Cu2p<sub>3/2</sub> transitions.
